# Supplementary material
Source: Springer Nature journal article supplement (https://www.springermedizin.de/resource/supplementary/13012_2012_540_MOESM4_ESM.pdf/9630000)
Supplement: MOESM4 [file 9630000]

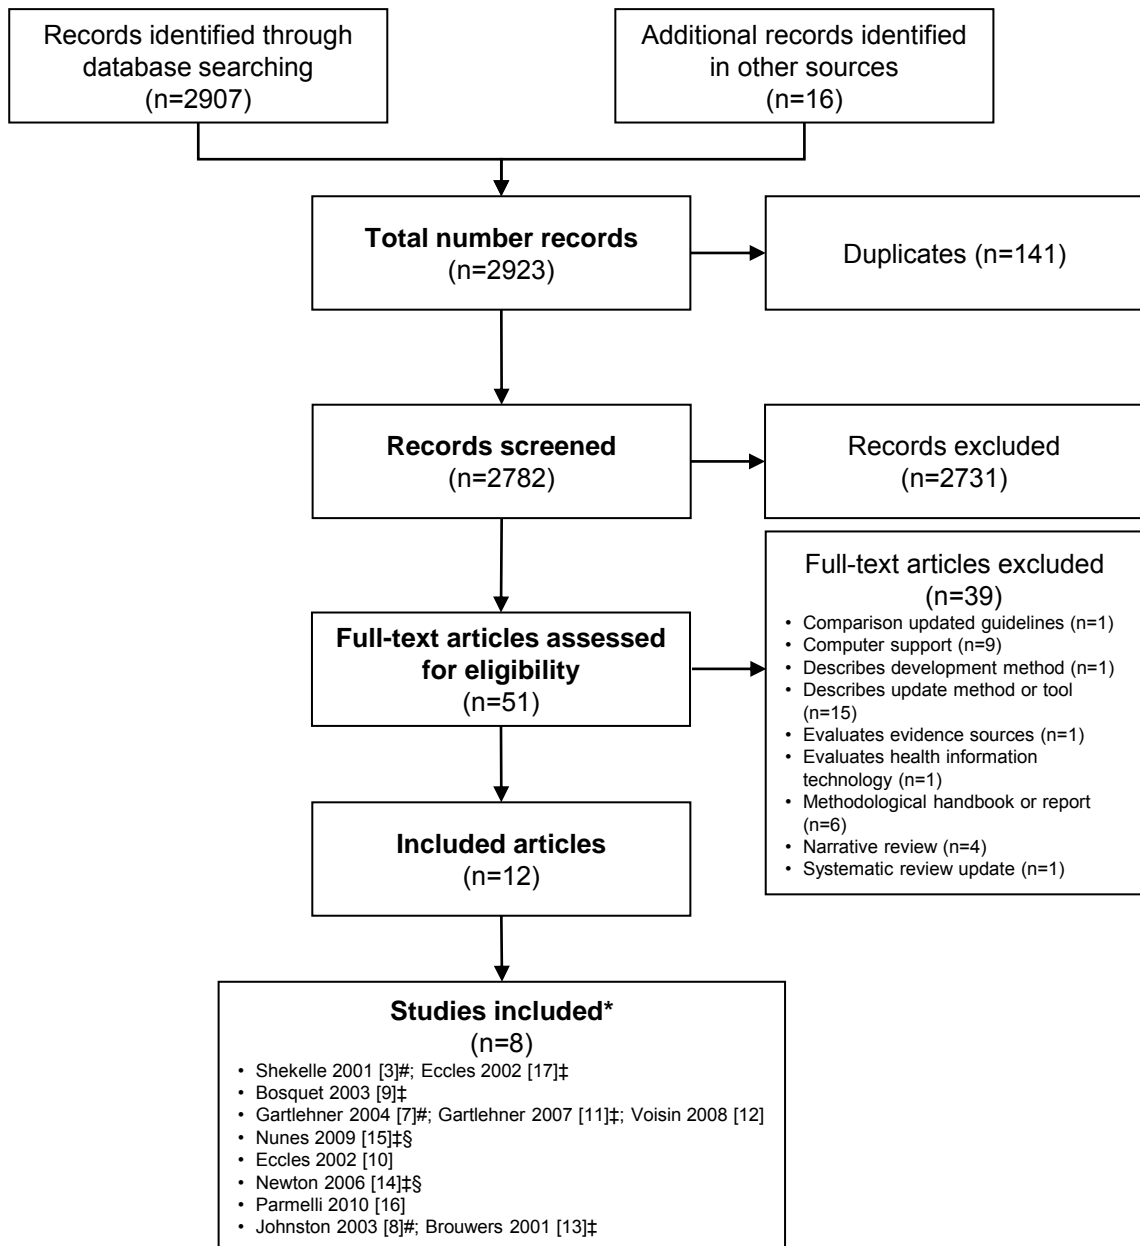

\*Ordered by type of strategy and chronology; #Main publication for the study; ‡Only abstract available; §Information provided by the author.
